# Supplementary material for: History of the Potsdam, Seddin and Niemegk Geomagnetic Observatories – Part 3: Niemegk
Source: Copernicus journal article supplement (doi:10.5194/hgss-2024-2), 2024-04-22
Supplement: Supplementary file [file hgss-2024-2-AC2-supplement.pdf]

Dear referee,

Thank you very much for your patience while commenting my paper. Your comprehensive comments are very helpful for me to improve the paper. I went through your comments one by one. Here are my responses:

I considered social and scientific aspects already from the beginning, for instance the construction problem of the variation house, the situation at the end of World War II and the problems of the German reunification on the personal. Maybe this is not sufficient in your opinion, but I do not know what is missing.

I am not a native English speaker. Therefore, a language improvement is necessary. I expect, Copernicus will ask an expert for this task – as my experience shows it from the edition process of parts 1 and 2.

Following the comments of referee1 I reformatted the paper completely. I very hope, that you can agree in the new structure.

I extended the information regarding the take over of the Kp index service following your comment.

Thank you again for taking your time to act as referee.
